# Supplementary material
Source: publisher site journal article supplement (https://www.dovepress.com/article/561240)
Supplement: Supplementary file 1 [file Supplementary%20_materials.docx]

Table S1. Summary of fixed effect of liner mixed model

| Outcome | Fixed Effect | Estimate | Std. Error | df | t-value | p-value |
| --- | --- | --- | --- | --- | --- | --- |
| EDT | Intercept | 11.09 | 5.06 | 44.38 | 2.19 | 0.033* |
| Session 2 | 0.09 | 0.63 | 318 | 0.15 | 0.884 |
| LC | 5.43 | 0.89 | 318 | 6.08 | <0.001*** |
| CS | 11.01 | 0.89 | 318 | 12.31 | <0.001*** |
| LS | 9.46 | 0.89 | 318 | 10.57 | <0.001*** |
| Male | 6.24 | 1.10 | 43 | 5.70 | <0.001*** |
| BMI | -0.26 | 0.22 | 43 | -1.17 | 0.248 |
| EPT | Intercept | 10.53 | 3.78 | 105 | 2.78 | 0.006** |
| Session 2 | 0.62 | 2.29 | 318 | 0.27 | 0.787 |
| LC | 9.94 | 3.24 | 318 | 3.07 | 0.002** |
| CS | 36.46 | 3.24 | 318 | 11.25 | <0.001*** |
| LS | 32.09 | 3.24 | 318 | 9.90 | <0.001*** |
| Male | 23.60 | 4.68 | 44 | 5.04 | <0.001*** |

LC, lateral calf; CS, cervical spine; LS, lumbar spine; *, p<0.05; **, p<0.01; ***, p<0.001.

Table S2. Post-hoc pairwise comparisons

| Outcome | Comparison | Estimate | Std. Error | df | t-ratio | p-value |
| --- | --- | --- | --- | --- | --- | --- |
| EDT | MF-LC | -5.43 | 0.89 | 318 | -6.08 | <0.001*** |
| MF-CS | -11.01 | 0.89 | 318 | -12.31 | <0.001*** |
| MF-LS | -9.46 | 0.89 | 318 | -10.57 | <0.001*** |
| LC-CS | -5.59 | 0.89 | 318 | -6.27 | <0.001*** |
| LC-LS | -4.04 | 0.89 | 318 | -4.54 | <0.001*** |
| CS-LS | 1.55 | 0.89 | 318 | 1.75 | 0.349 |
| Female-Male | -6.24 | 1.10 | 43 | -5.70 | <0.001*** |
| EPT | MF-LC | -9.94 | 3.24 | 318 | -3.07 | <0.001*** |
| MF-CS | -36.46 | 3.24 | 318 | -11.25 | <0.001*** |
| MF-LS | -32.09 | 3.24 | 318 | -9.90 | <0.001*** |
| LC-CS | -26.52 | 3.24 | 318 | -8.20 | <0.001*** |
| LC-LS | -22.15 | 3.24 | 318 | -6.83 | <0.001*** |
| CS-LS | 4.37 | 3.24 | 318 | 1.35 | 0.529 |
| Female-Male | -23.60 | 4.68 | 44 | -5.04 | <0.001*** |

MF, medial forearm; LC, lateral calf; CS, cervical spine; LS, lumbar spine; ***, p<0.001.
